# Supplementary material for: Quenching of fully symmetric mixtures of oppositely charged microgels: the role of soft stiffness
Source: Royal Society of Chemistry journal article supplement (doi:10.1039/c8sm00441b), 2018-01-01
Supplement: c8sm00441b1.pdf [file c8sm00441b1.pdf]

**Electronic Supplementary Information:**

**Quenching of fully symmetric mixtures of oppositely charged microgels:  
the role of soft stiffness**

Thiago Colla,<sup>a,b</sup> Ronald Blaak<sup>b</sup> and Christos N. Likos<sup>b</sup>

<sup>a</sup>*Instituto de Física, Universidade Federal der Ouro Preto,  
CEP 35400-000 Ouro Preto, MG, Brazil*

<sup>b</sup>*Faculty of Physics, University of Vienna, Boltzmannngasse 5, 1090 Vienna, Austria*

We supply four short videos from our MD simulations, showing the self-assembly of oppositely charged model microgels considered in the main article. The files are named *Zxxx\_kyy\_eps50.mp4*. The number xxx denotes the value of the valency  $Z$  of the microgel, whereas the number yy denotes the value  $\kappa\sigma$  of the inverse screening length. In all videos, the Hertzian potential parameter has the value  $\varepsilon = 50$ .
